# Supplementary material for: Safety of pulsed field ablation in more than 17,000 patients with atrial fibrillation in the MANIFEST-17K study
Source: PubMed Central journal article supplement (PMC11271404; doi:10.1038/s41591-024-03114-3), 2024-07-08
Supplement: 41591_2024_3114_MOESM1_ESM.pdf [file 41591_2024_3114_MOESM1_ESM.pdf]

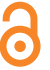

---

# **Safety of pulsed field ablation in more than 17,000 patients with atrial fibrillation in the MANIFEST-17K study**

---

In the format provided by the authors and unedited

---

## Participating Centers

| No. | Center, Location                                                                                                                                                                                                      | Collaborators                                                                                                                 | No. of Patients |
|-----|-----------------------------------------------------------------------------------------------------------------------------------------------------------------------------------------------------------------------|-------------------------------------------------------------------------------------------------------------------------------|-----------------|
| 1   | * Homolka Hospital, Prague, Czech Republic                                                                                                                                                                            | Petr Neuzil, MD<br>Jan Petru, MD                                                                                              | 1277            |
| 2   | *Department of Cardiology, Inselspital, Bern University Hospital, University of Bern, Bern, Switzerland                                                                                                               | Prof. Tobias Reichlin, MD<br>Thomas Küffer, MD                                                                                | 815             |
| 3   | * IKEM, Prague, Czech Republic                                                                                                                                                                                        | Joseph Kautzner, MD<br>Petr Peichl, MD                                                                                        | 707             |
| 4   | * Catharina Ziekenhuis Eindhoven, The Netherlands                                                                                                                                                                     | Pepijn van der Voort, MD<br>Lukas Dekker, MD                                                                                  | 698             |
| 5   | * IHU LIRYC, CHU Bordeaux, University of Bordeaux, France                                                                                                                                                             | Pierre Jais, MD                                                                                                               | 650             |
| 6   | Heart Rhythm Management Centre, Postgraduate Program in Cardiac Electrophysiology and Pacing, Universitair Ziekenhuis Brussel, Vrije Universiteit Brussel, European Reference Networks Guard-Heart, Brussels, Belgium | Domenico G. Della Rocca, MD, PhD<br>Andrea Sarkozy, MD, PhD<br>Gian-Battista Chierchia, MD, PhD<br>Carlo de Asmundis, MD, PhD | 472             |
| 7   | Ceske Budejovice Hospital and Faculty of Health and Social Sciences, University of South Bohemia in Ceske Budejovice, Czech Republic                                                                                  | Alan Bulava, MD                                                                                                               | 460             |
| 8   | *Universitair Medisch Groningen, Netherlands                                                                                                                                                                          | Yuri Blaauw, MD                                                                                                               | 457             |
| 9   | University Hospital Olomouc, Czech Republic<br>Disclosures: none                                                                                                                                                      | Tomas Skala, MD, PhD<br>Ondrej Moravec, MD, PhD                                                                               | 441             |
| 10  | *Neuron Medical, Brno, Czech Republic                                                                                                                                                                                 | Martin Fiala, MD, PhD<br>Moritoshi Funasako, MD                                                                               | 437             |
| 11  | Az Sint Jan Hospital, Bruges, Belgium                                                                                                                                                                                 | Mattias Duytschaever, MD, PhD<br>Sebastien Knecht, MD, PhD<br>Rene Tavernier, MD<br>Benjamin De Becker, MD                    | 435             |
| 12  | 1. Atrial Fibrillation Institute, Mater Private Hospital, Dublin Eccles street, Dublin 7, Ireland<br>2. Cardiovascular Research Institute, Royal College of Surgeons in Ireland                                       | Prof. Gabor Szeplaki, MD, PhD<br>Gael Jauvert, MD                                                                             | 432             |
| 13  | * Cardioangiologisches Centrum Bethanien, Frankfurt, Germany                                                                                                                                                          | Boris Schmidt, MD<br>Julian Chun, MD                                                                                          | 403             |
| 14  | Clermont Ferrand university hospital, 63000 Clermont-Ferrand, France                                                                                                                                                  | Grégoire Massoullie, MD<br>Romain Eschalié, MD, PhD                                                                           | 374             |

|    |                                                                                                                                                                                                                                        |                                                |     |
|----|----------------------------------------------------------------------------------------------------------------------------------------------------------------------------------------------------------------------------------------|------------------------------------------------|-----|
| 15 | <p>*Alfried Krupp Hospital<br/>Dept. of Electrophysiology<br/>Alfried-Krupp-Str. 21<br/>45131 Essen<br/>Germany</p> <p>Witten/Herdecke University<br/>Dept. of Medicine<br/>Alfred-Herrhausen-Str. 50<br/>58455 Witten<br/>Germany</p> | <p>Kars Neven, MD, PhD<br/>Anna Füting, MD</p> | 340 |
| 16 | GHP Ambroise Paré Hartmann, neuilly sur Seine, France.                                                                                                                                                                                 | Olivier Thomas, MD<br>Alexandre ZHAO, MD       | 257 |
| 17 | * Jessa Hospitals, Hasselt, Belgium                                                                                                                                                                                                    | Johan Vijgen, MD<br>Pieter Koopman, MD         | 230 |
| 18 | Sorbonne Université, APHP, Pitié-Salpêtrière Hospital, Institute of Cardiology, ICAN<br>Institute for Cardiometabolism and Nutrition, Paris, France.                                                                                   | Estelle Gandjbakhch, MD<br>Mikael Laredo, MD   | 226 |
| 19 | *Medical University of Graz, Austria                                                                                                                                                                                                   | Daniel Scherr, MD<br>Martin Manninger, MD      | 220 |
| 20 | *Copenhagen University Hospital Gentofte, Denmark                                                                                                                                                                                      | Arne Johannessen, MD, PhD<br>Jim Hansen, MD    | 218 |
| 21 | Blackrock clinic, Dublin, Ireland                                                                                                                                                                                                      | David Keane, MD<br>Daniel O'Hare, MD           | 214 |
| 22 | *1- Heart Rhythm Management Department, Clinique Pasteur, Toulouse, France.<br>2- University of Brussels VUB, Jette Brussels, Belgium.                                                                                                 | Serge Boveda, MD, PhD                          | 210 |
| 23 | *University Hospital Rangueil, Toulouse, France                                                                                                                                                                                        | Philippe Maury, MD<br>Anne Rollin, MD          | 205 |
| 24 | 1) Clinica Universidad de Navarra. University of Navarra. Pamplona, Spain<br>2) IdiSNA. Instituto de Investigación Sanitaria de Navarra. Pamplona, Spain                                                                               | Ignacio García-Bolao , MD                      | 200 |
| 25 | *University Hospital Center Split, Split, Croatia                                                                                                                                                                                      | Ante Anic, MD<br>Zrinka Jurisic MD, PhD        | 194 |
| 26 | privathospitalet mølholm a/s, Denmark                                                                                                                                                                                                  | Peter Steen Hansen, MD                         | 191 |
| 27 | Clinique du Millenaire, Montpellier, France                                                                                                                                                                                            | Franck Raczka, MD                              | 190 |
| 28 | Centre Cardiologique du Nord, France                                                                                                                                                                                                   | Antoine Lepillier, MD                          | 190 |
| 29 | GHICL Hôpital Saint Philibert, France                                                                                                                                                                                                  | Yves Guyomar, MD                               | 188 |
| 30 | Liverpool Heart and Chest Hospital, Liverpool, UK                                                                                                                                                                                      | Dhiraj Gupta, MD                               | 188 |

|    |                                                                                                                                                                                     |                                                              |     |
|----|-------------------------------------------------------------------------------------------------------------------------------------------------------------------------------------|--------------------------------------------------------------|-----|
| 31 | Enschede, Medisch Spectrum Twente, Netherlands                                                                                                                                      | Jurren Van Opstal, MD                                        | 183 |
| 32 | Cardiology Department, Grenoble Alpes University Hospital and University, 38043 Grenoble, France                                                                                    | Pascale Defaye, MD                                           | 180 |
| 33 | University Hospital Basel, Switzerland                                                                                                                                              | Christian Sticherling, MD                                    | 170 |
| 34 | *Heart & Diabetes Center NRW, Ruhr-Univ Bochum, Germany                                                                                                                             | Philipp Sommer, MD<br>Thomas Fink, MD                        | 169 |
| 35 | Liberec, Czech Republic                                                                                                                                                             | Pavel Kucera, MD<br>Tomas Roubicek, MD, PhD<br>Jan Stros, MD | 159 |
| 36 | Polytechnic and University La Fe Hospital, Valencia, Spain.                                                                                                                         | Joaquin Osca, MD                                             | 157 |
| 37 | Capio Arytmi center Stockholm, Sweden.                                                                                                                                              | Fariborz Tabrizi, MD, PhD.                                   | 153 |
| 38 | pole sante republique elsan, France                                                                                                                                                 | Antoine Roux, MD                                             | 148 |
| 39 | Uniklinikum RWTH Aachen, Department of Cardiology, Pauwelsstr. 30, 52074 Aachen, Germany                                                                                            | Michael Gramlich, MD                                         | 147 |
| 40 | Ospedale Isola Tiberina Gemelli. Rome , Italy                                                                                                                                       | Stefano Bianchi, MD                                          | 135 |
| 41 | hospital de santa cruz, Portugal                                                                                                                                                    | Pedro Adragão, MD                                            | 134 |
| 42 | Montevergine Clinic - Mercogliano (AV), Italy                                                                                                                                       | Francesco Solimene, MD                                       | 130 |
| 43 | Dept of Biomedical, Surgical and Dental Sciences, University of Milan, Milan, Italy                                                                                                 | Claudio Tondo, MD                                            | 128 |
| 44 | Biomedical Science and public Health Department UNIVPM Ancona Italy and Cardiology and Arrhythmology clinic Department Azienda Ospedaliera Universitaria Delle Marche Ancona, Italy | Antonio Dello Russo MD, PhD.                                 | 126 |
| 45 | Medical University of Tuebingen, Germany                                                                                                                                            | Jürgen Schreieck, MD                                         | 125 |
| 46 | Städtisches Klinikum Karlsruhe, Germany                                                                                                                                             | Armin Luik, MD                                               | 123 |
| 47 | universitätsklinikum düsseldorf, Germany                                                                                                                                            | Obaida Rana, MD                                              | 120 |
| 48 | Clinic for Cardiology II - Electrophysiology, University of Münster, Germany                                                                                                        | Gerrit Frommeyer, MD                                         | 120 |
| 49 | *Rouen Hospital, Rouen, France                                                                                                                                                      | Frédéric Anselme, MD., PhD<br>Corentin Chaumont, MD          | 114 |
| 50 | St.-Johannes-Hospital, Dortmund, Germany                                                                                                                                            | Ingo Kreis, MD                                               | 110 |
| 51 | Tel Aviv Sourasky Medical Center, Tel Aviv, Israel                                                                                                                                  | Raphael Rosso, MD                                            | 110 |
| 52 | *University Heart and Vascular Center, UKE-Hamburg, Germany                                                                                                                         | Andreas Metzner, MD                                          | 109 |
| 53 | Semmelweis University, Cardiovascular Center, Budapest, Hungary                                                                                                                     | Laszlo Geller, MD                                            | 103 |
| 54 | Hirslanden Klinik Beau-Site, Bern, Switzerland                                                                                                                                      | Samuel H. Baldinger, MD                                      | 97  |

|    |                                                                                                                                                                                                       |                                                                                                     |    |
|----|-------------------------------------------------------------------------------------------------------------------------------------------------------------------------------------------------------|-----------------------------------------------------------------------------------------------------|----|
| 55 | Hospital Clínico Universitario de Valencia, Spain                                                                                                                                                     | Angel Ferrero, MD                                                                                   | 94 |
| 56 | *Asklepios Hospital St.Georg, Hamburg, Germany                                                                                                                                                        | Stephan Willems, MD<br>Melanie Gunawerdene, MD                                                      | 93 |
| 57 | St. Vincenz-Hospital Paderborn, Germany                                                                                                                                                               | Andreas Goette, MD                                                                                  | 93 |
| 58 | Cardiology Dept. Royal Papworth Hospital, Cambridge, UK                                                                                                                                               | Greg Mellor, MD<br>Claire Martin, MD                                                                | 93 |
| 59 | Universitätsklinikum Essen, Germany                                                                                                                                                                   | Shibu Mathew, MD                                                                                    | 90 |
| 60 | National Institute of Cardiology, Warsaw, Poland                                                                                                                                                      | Lukasz Szumowski, MD, PhD                                                                           | 88 |
| 61 | *Department of Rhythmology, University Heart Center Lübeck, University Hospital Schleswig-Holstein, Lübeck, Germany<br>German Center for Cardiovascular Research (DZHK), Partner Site Lübeck, Germany | Roland Tilz, MD<br>Bettina Kirstein, MD                                                             | 86 |
| 62 | Maria Cecilia Hospital, Cotignola, Italy                                                                                                                                                              | Saverio Iacopino, MD                                                                                | 86 |
| 63 | Rigshospitalet, University Hospital of Copenhagen, Denmark                                                                                                                                            | Peter Karl Jacobsen, MD<br>Niels Sandgaard, MD                                                      | 80 |
| 64 | Henry Dunant Hospital, Athens, Greece                                                                                                                                                                 | Andrikopoulos George MD,<br>PhD, FESC,                                                              | 80 |
| 65 | Fnkv, Czech Republic                                                                                                                                                                                  | Pavel Osmancik, MD, PhD                                                                             | 79 |
| 66 | Praxisklinik Herz und Gefäße, Dresden, Germany                                                                                                                                                        | Stefan Spitzer, MD                                                                                  | 79 |
| 67 | Nhssc Royal Bournemouth Hospital, UK                                                                                                                                                                  | Richard Balasubramaniam, MD                                                                         | 76 |
| 68 | Deutsches Herzzentrum der Charité, Campus Virchow-Klinikum, Germany                                                                                                                                   | Abdul Shokor Parwani, MD                                                                            | 74 |
| 69 | *Heart Center Bad Neustadt, Germany                                                                                                                                                                   | Thomas Deneke, MD<br>Karin Nentwich, MD                                                             | 71 |
| 70 | Department of Cardiology, Medical University of Lublin, Poland                                                                                                                                        | Andrzej Glowniak, MD, PhD<br>Aleksander Konopka, MD<br>Adam Tarkowski, MD<br>Katarzyna Wojewoda, MD | 71 |
| 71 | Department of Cardiology, San Bortolo Hospital, Vicenza, Italy                                                                                                                                        | Antonio Rossillo, MD                                                                                | 70 |
| 72 | Ordensklinikum Linz Elisabethinen, Linz, Austria                                                                                                                                                      | Helmut Pürerfellner, MD                                                                             | 65 |
| 73 | Hannover Heart Rhythm Center, Department of Cardiology and Angiology, Hannover Medical School, Hannover, Germany                                                                                      | David Duncker, MD                                                                                   | 65 |
| 74 | Klinikum Ingolstadt, Germany                                                                                                                                                                          | Peter Reil, MD<br>Vjosa Thaci-Kadriu, MD                                                            | 64 |
| 75 | *Universitätsklinikum Freiburg, Germany                                                                                                                                                               | Thomas Arentz, MD<br>Heiko Lehrmann, MD                                                             | 63 |

|    |                                                                                                                                                                                                                                                                                                         |                                                                                             |    |
|----|---------------------------------------------------------------------------------------------------------------------------------------------------------------------------------------------------------------------------------------------------------------------------------------------------------|---------------------------------------------------------------------------------------------|----|
| 76 | *Universitätsklinikum Köln AÖR, Germany<br>Department for Electrophysiology, Heart<br>Center University Cologne, Cologne,<br>Germany.                                                                                                                                                                   | Daniel Steven<br>Arian Sultan, MD                                                           | 58 |
| 77 | Arrhythmia Service, Cardiology Department,<br>University Hospital Marqués De Valdecilla,<br>Santander, Spain                                                                                                                                                                                            | Juan José Olalla, MD, PhD<br>Felipe Rodriguez-Entem, MD,<br>PhD<br>Víctor Exposito, MD, PhD | 58 |
| 78 | OLVG, Amsterdam, The Netherlands                                                                                                                                                                                                                                                                        | Jonas S.S.G. de Jong, MD, PhD                                                               | 56 |
| 79 | *University Duisburg-Essen, Duisburg,<br>Germany<br>University Hospital Frankfurt, Goethe<br>University Frankfurt, Germany                                                                                                                                                                              | Reza Wakili, MD<br>Jan Bohnen, MD                                                           | 54 |
| 80 | L'Hôpital Privé du Confluent, Nantes, France                                                                                                                                                                                                                                                            | Selim ABBEY, MD                                                                             | 50 |
| 81 | Christliches Klinikum Unna, Unna, Germany                                                                                                                                                                                                                                                               | Gottschling Timo MD<br>Georg Nölker, MD                                                     | 50 |
| 82 | Hospital Quironsalud, Zaragoza, Spain.                                                                                                                                                                                                                                                                  | Antonio Asso, MD                                                                            | 50 |
| 83 | Royal Brompton and Harefield Hospitals,<br>Guy's and St Thomas' NHS Foundation Trust.<br>King's College and Imperial College, UK.                                                                                                                                                                       | Tom Wong, MD                                                                                | 50 |
| 84 | Chru Tours Hôpital TROUSSEAU, France.                                                                                                                                                                                                                                                                   | Bertrand Pierre, MD                                                                         | 48 |
| 85 | Vivantes Klinikum Am Urban, Berlin, Germany                                                                                                                                                                                                                                                             | Niels Christian Ewertsen, MD                                                                | 47 |
| 86 | Georg-August-Universität Göttingen,<br>Germany                                                                                                                                                                                                                                                          | Leonard Bergau, MD<br>Nibras Soubh                                                          | 47 |
| 87 | Arrhythmia Unit, Cardiology Department,<br>University Hospital Ramón y Cajal, Madrid,<br>Spain                                                                                                                                                                                                          | Cristina Lozano-Granero, MD<br>PhD<br>Javier Moreno Planas, MD                              | 47 |
| 88 | Ziekenhuis Oost Limburg, Genk, Belgium                                                                                                                                                                                                                                                                  | Maximo Rivero, MD, PhD                                                                      | 46 |
| 89 | kantonsspital baden ag, Switzerland                                                                                                                                                                                                                                                                     | Alexander Breitenstein, MD                                                                  | 46 |
| 90 | Tampere Heart Hospital, Tampere University<br>Hospital, Finland                                                                                                                                                                                                                                         | Jaako Inkovaara, MD                                                                         | 44 |
| 91 | Hopital De La Croix Rousse Nord, France                                                                                                                                                                                                                                                                 | Samir Fareh, MD<br>Paul Charles, MD<br>Mathieu Montoy, MD                                   | 43 |
| 92 | Centre Hospitalier Princesse Grace, Monaco                                                                                                                                                                                                                                                              | Decebal Gabriel Latcu, MD                                                                   | 41 |
| 93 | 1) Department of Cardiology, Cardiovascular<br>Research Institute Maastricht (CARIM),<br>Maastricht University Medical Centre,<br>Maastricht, The Netherlands.<br>2) Faculty of Health and Medical Sciences,<br>Department of Biomedical Sciences,<br>University of Copenhagen, Copenhagen,<br>Denmark. | Dominik Linz, MD, PhD                                                                       | 38 |
| 94 | Knappschafts-Kh Recklinghausen, Germany                                                                                                                                                                                                                                                                 | Patrick Müller, MD                                                                          | 37 |

|     |                                                                                                                                                         |                                          |    |
|-----|---------------------------------------------------------------------------------------------------------------------------------------------------------|------------------------------------------|----|
| 95  | Arrhythmias Unit. Cardiology Department, Lozano Blesa Clinical University Hospital, Zaragoza, Spain. Aragón Health Research Institute, Zaragoza, Spain. | Javier Ramos-Maqueda, MD                 | 33 |
| 96  | Heart Center Bonn, Department of Internal Medicine II, University Hospital Bonn, Bonn, Germany                                                          | Thomas Beiert, MD<br>Jan Schrickel, MD   | 30 |
| 97  | <i>Ospedale dell'Angelo</i> , Mestre-Venezia, Italy                                                                                                     | Sakis Themistoclakis, MD                 | 30 |
| 98  | Carl-Thiem-Klinikum Cottbus, Germany                                                                                                                    | Dirk Grosse Meininghaus, MD              | 29 |
| 99  | Allgemeines Krankenhaus Universitätsklinik Wien, Austria                                                                                                | Günter Stix, MD<br>Robert Schonbauer, MD | 28 |
| 100 | Mitera Hospital, Athens Greece                                                                                                                          | Stylios Tzeis, MD                        | 26 |
| 101 | Department of Internal Medicine and Cardiology University Clinical Center, Medical University of Warsaw, Warsaw, Poland.                                | Jakub Baran, MD, PhD.                    | 26 |
| 102 | Linköpings University Hospital, Sweden                                                                                                                  | Henrik Almroth, MD                       | 23 |
| 103 | Hospital Doce De Octubre, Spain                                                                                                                         | Daniel Rodriguez Munoz, MD, PhD          | 22 |
| 104 | Arrhythmia Unit. Cardiology Department. Santa Maria University Hospital. Lisbon Academic Medical Center, Portugal                                       | João de Sousa, MD                        | 21 |
| 105 | Onassis Cardiac Surgery Center Department of Cardiac Electrophysiology and Pacing, Athens, Greece                                                       | Michalis Efremidis, MD                   | 18 |
| 106 | Uniwersyteckie Centrum Kliniczne, Warsaw, Poland                                                                                                        | Pawel Balsam, MD, PhD                    | 17 |

\* Sites which also participated in the initial *MANIFEST-PF* study.

# MANIFEST-17K CRFs

## MANIFEST-17K: Multi-national Survey on Methods, and Safety on the Post-approval Clinical use of Pulsed Field Ablation

[ Case Report Form; Note: all below questions refer to the Farapulse Farawave Catheter. ]

List Center: \_\_\_\_\_

1. Region: Which country is your center from? \_\_\_\_\_
  
2. Demographics/Practice:
  - a. How many different operators at your center perform pulsed field ablation?  
\_\_\_\_\_
  - b. Years in practice of the electrophysiologist(s)  
\_\_\_\_\_
  - c. Approximate annual number of AF ablations performed at your center  
\_\_\_\_\_
  - d. Practice "type": Academic, Private, Hybrid  
\_\_\_\_\_
  
3. When was commercial pulsed field ablation introduced at your center (month/year)?  
\_\_\_\_\_

4. For data provided below, what are the dates of the first and last procedures performed (month/year)?  
First: \_\_\_\_\_ Last: \_\_\_\_\_

5. How many pulsed field ablation procedures have been performed at your center for atrial fibrillation/flutter/tachycardia (for *MANIFEST-PF* Consortium sites, please do not include any patients reported in the initial *MANIFEST-PF* Safety Evaluation)?  
(please complete in table below)

|                                                       |  |
|-------------------------------------------------------|--|
| Total number of patients undergoing PFA for AF/AFL/AT |  |
| How many patients with Paroxysmal AF?                 |  |
| How many patients with persistent AF?                 |  |



|                                                                 |  |
|-----------------------------------------------------------------|--|
| How many patients with long standing persistent AF?             |  |
| How many patients with atrial flutter/tachycardia <b>only</b> ? |  |

6. What are the baseline characteristics of the patients who have undergone pulsed field ablation (for AF only) at your center? (please complete table below)

|                                 |                                  |
|---------------------------------|----------------------------------|
| Age (average, minimum, maximum) | AVG: _____ MIN: _____ MAX: _____ |
| Sex (male=n, female=n)          | MALE: _____ FEMALE: _____        |

7. Typical anesthesia strategy:

- a. Fraction of procedures using GA (with endotracheal intubation): \_\_\_\_\_%
- b. Fraction of procedures using deep sedation (no intubation): \_\_\_\_\_%

8. Complications after pulsed field ablation: please complete table below.

**Complications** n

|                                                                                                                                                                       |                                  |
|-----------------------------------------------------------------------------------------------------------------------------------------------------------------------|----------------------------------|
| Peri-procedural Death (within 30 days)                                                                                                                                |                                  |
| Myocardial Infarction (within 30 days)                                                                                                                                |                                  |
| Phrenic nerve injury<br>---Total number of events<br>---Number recovered be next day<br>---Number recovered by 1 month<br>---Not yet recovered (list longest f/u)     | _____<br>_____<br>_____<br>_____ |
| Stroke (within 7 days)                                                                                                                                                |                                  |
| TIA (within 7 days)                                                                                                                                                   |                                  |
| Silent cerebral events (if screening MRIs done)<br>---Number of pts with MRI<br>---Number with positive MRIs                                                          | _____<br>_____                   |
| Other thromboembolism                                                                                                                                                 |                                  |
| Pericardial effusion<br>---Total number of events<br>---No intervention<br>---Requiring <b>percutaneous</b> intervention<br>---Requiring <b>surgical</b> intervention | _____<br>_____<br>_____<br>_____ |
